# Supplementary material
Source: publisher site journal article supplement (https://www.dovepress.com/article/480540)

**Supplementary Table S1.**

| **RF** | **SVM-RFE** | **LASSO** |
| --- | --- | --- |
| OGDHL | S100A9 | SPARCL1 |
| HILPDA | SLAIN1 | MMD |
| SPARCL1 | PKIB | NDRG1 |
| PON3 | CYP4X1 | EMCN |
| LPCAT1 | ADH1C | NUDT6 |
| PSRC1 | TSPAN8 | ADH1C |
| MMD | SPARCL1 | LIN28B |
| MMP12 | CXCL11 | AQP1 |
| DDB2 | RBP7 | LOX |
| NDRG1 | CDCA7 | TSPAN13 |
| EMCN | SLC22A7 | DDB2 |
| TMEM150C | DUSP9 | S100A9 |
| ABCB4 | MASP2 | CA2 |
| PCK2 | IGF2BP3 | CYP4X1 |
| GNMT | GJB6 | GJB6 |
| ADH1C | AR | SLC6A14 |
| GAS2L3 | LIN28B | SLAIN1 |
| FAS | CCL16 | CDCA7 |
| HK2 | ABAT | SYT1 |
| NUDT6 | IL32 | PKIB |
| BAMBI | BHMT | DHRS2 |
| CYP1A2 | TRIM71 | EPCAM |
| AASS | ABCA6 | TSPAN8 |
| AQP1 | CYP1A1 | SLC22A7 |
| RTP3 | EMCN | CXCL11 |
| HCAR3 | ANGPTL3 |  |
| HPD | CH25H |  |
| ADHFE1 | TNFSF14 |  |
| CXCL11 |  |  |
| MMP1 |  |  |
| ADH1A |  |  |
| LIN28B |  |  |

**Supplementary FigureS1.** Expressions of five key genes in different HCC cell lines through Human Protein Atlas (HPA) online database.


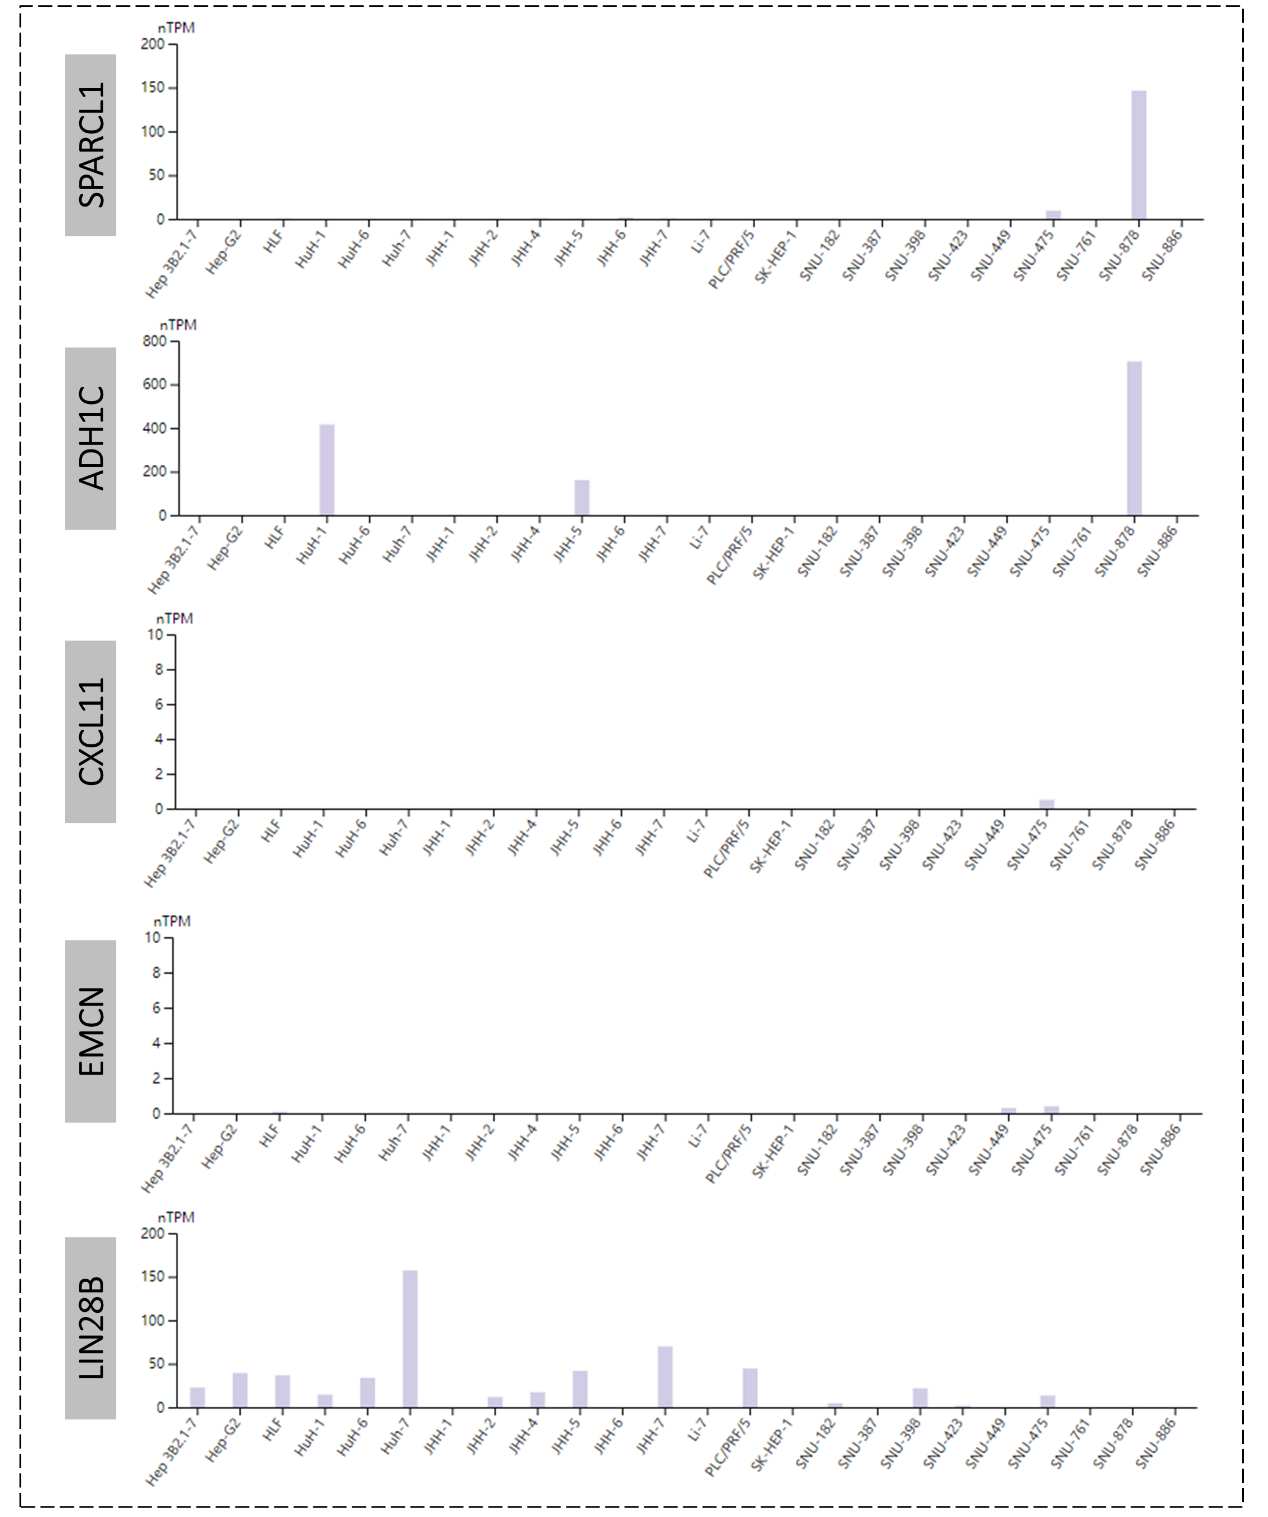


**Supplementary FigureS2.** Expressions of five key genes at single-cell level by HCCDB v2.0 repository.


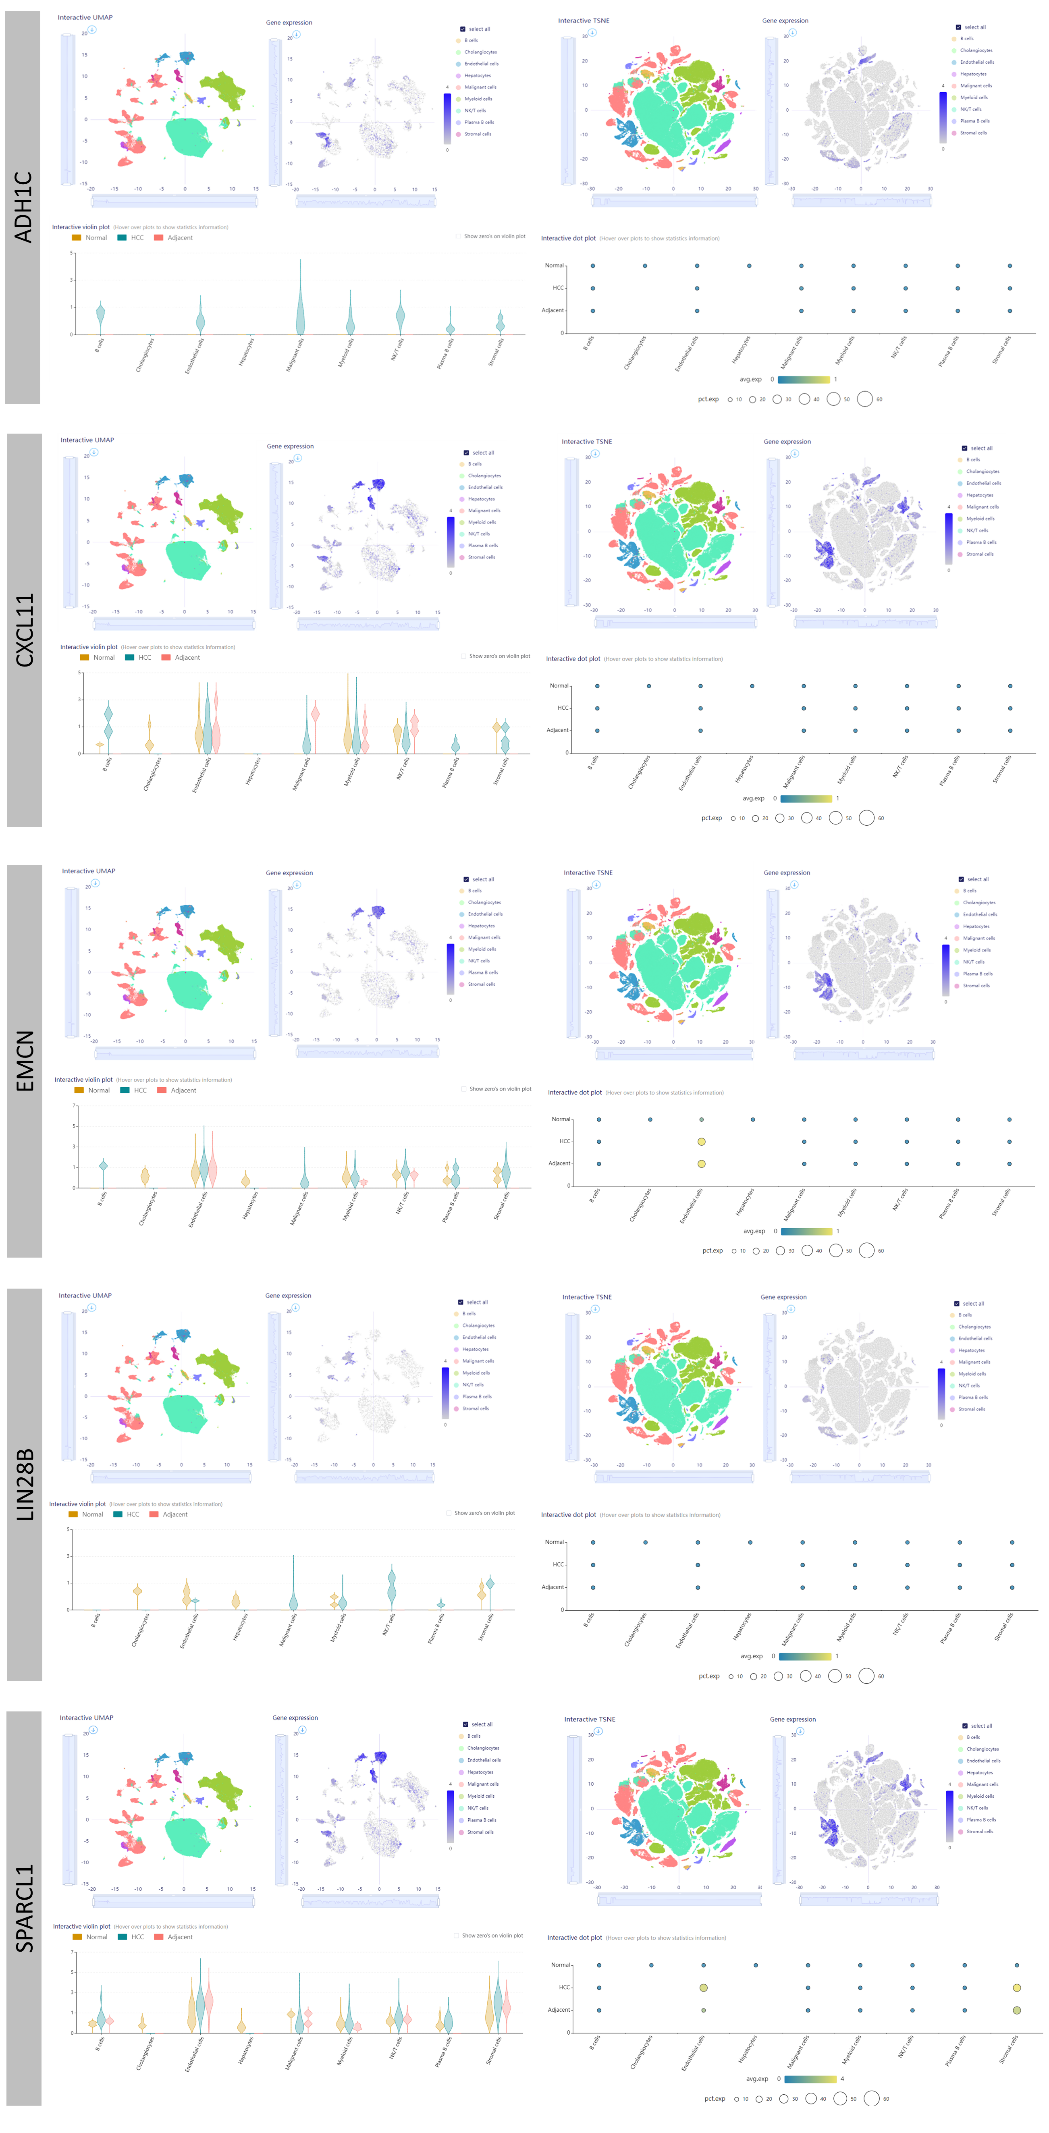

Supplement: Supplementary file 1 [file get_supplementary_file.php]
